# Supplementary material
Source: publisher figshare collection journal article supplement (https://acs.figshare.com/ndownloader/files/4028212)
Supplement: Supplementary file 1 [file 4028212]

Figure S1 A

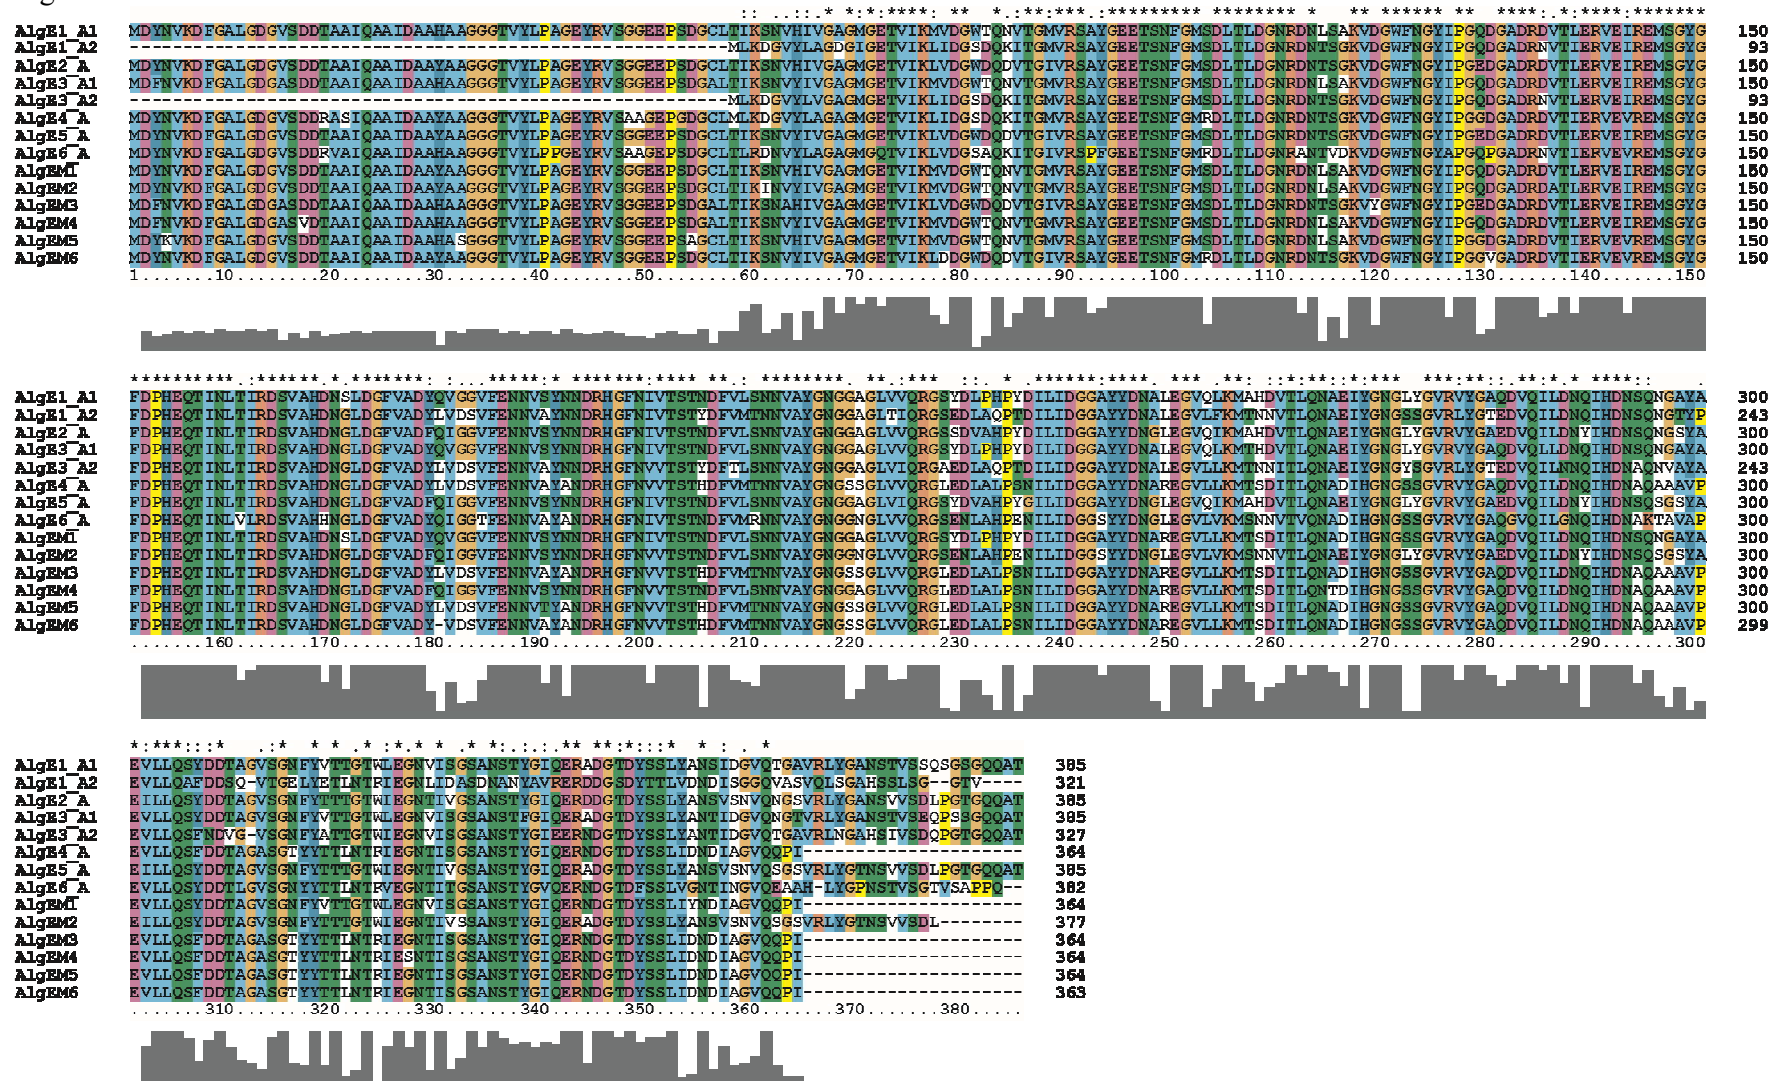

Figure S1 B

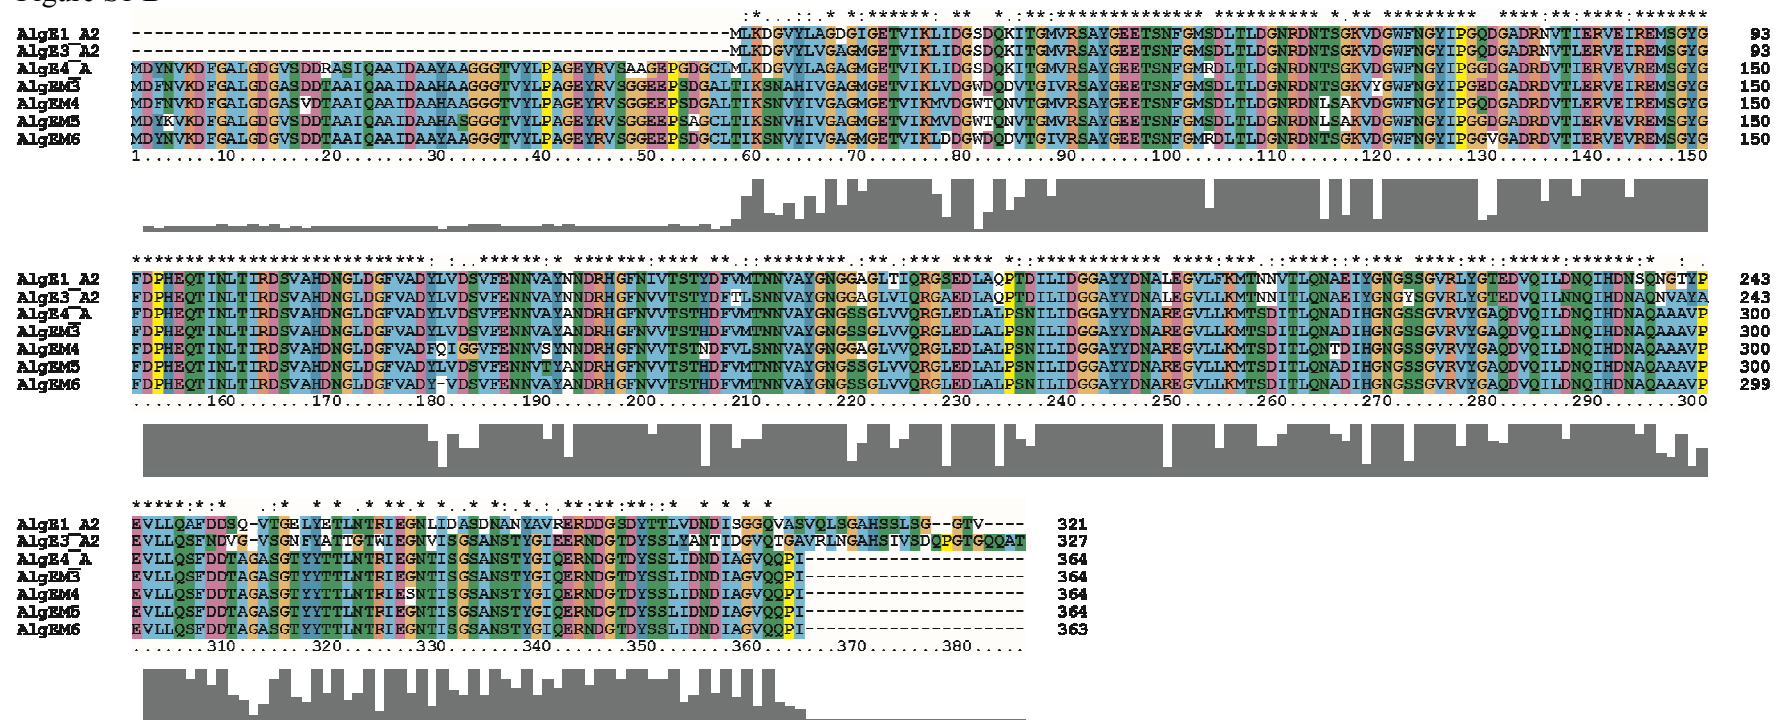

Figure S1 C

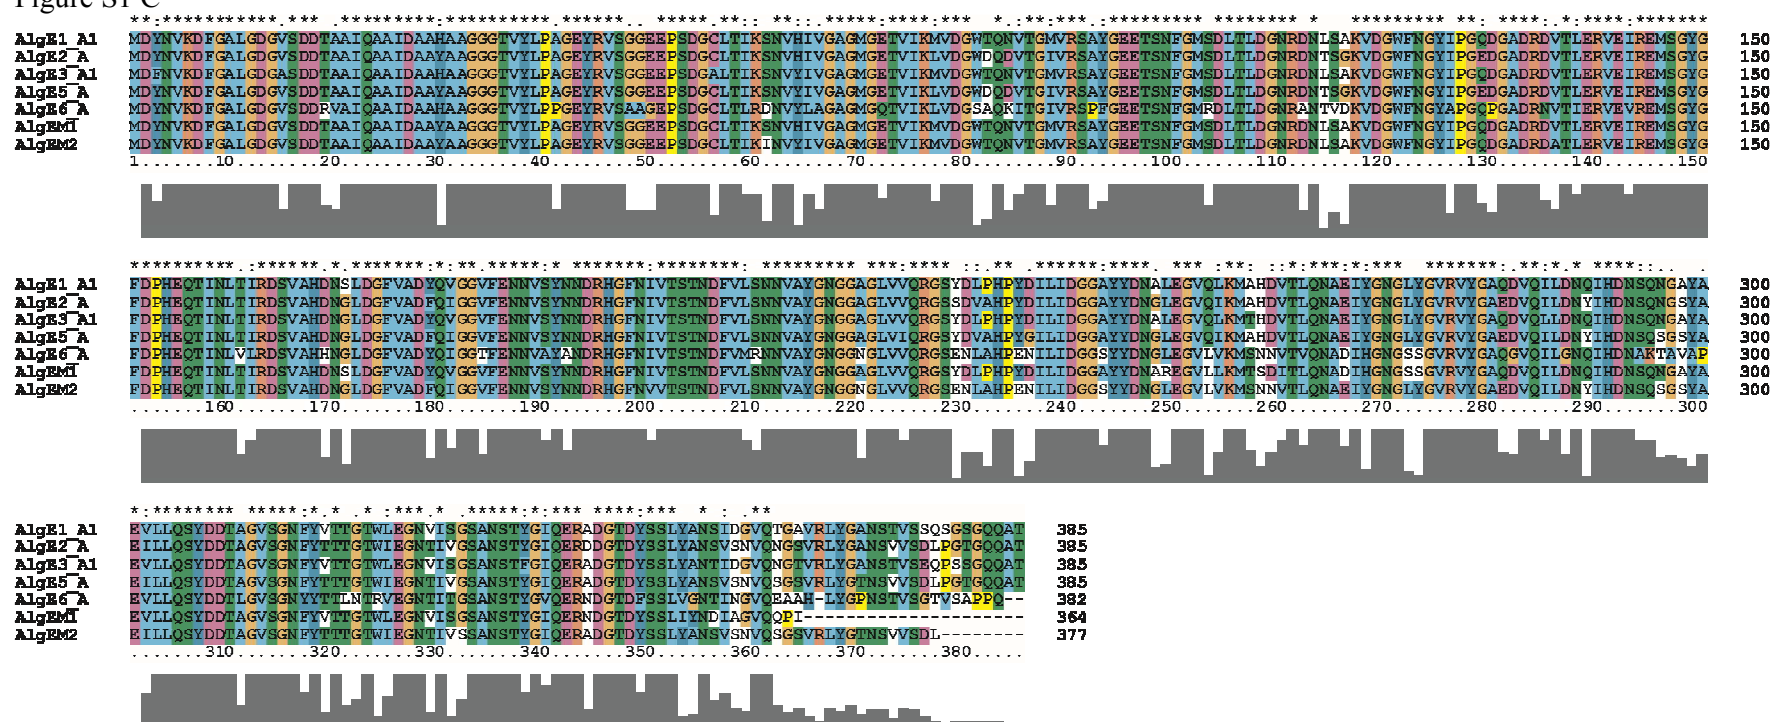

Figure S1: Multiple sequence alignment of epimerase A-module from *Azotobacter vinelandii* and the mutant A-modules for AlgEM1-6. Standard colour code for the amino acid types in ClustalX2 software is used. \*indicates residues identity, : means conserved amino acids, · shows semi-conserved amino and the height of the bar indicate the degree of conservation (ClustalX2 definitions). (A) Multiple sequence alignment of epimerase from AlgE1-AlgE6 from *A. vinelandii* and the mutant A-modules for AlgEM1-6. (B) Multiple sequence alignment of MG –block forming epimerase from AlgE1,AlgE3 and AlgE4 from *A. vinelandii* and the mutant A-modules for AlgEM3-6. (C) Multiple sequence alignment of GG –block forming epimerase from AlgE1-AlgE3 and AlgE5-AlgE6 from *A. vinelandii* and the mutant A-modules for AlgEM1-2.



Table S1. Plasmids used in this study

| Plasmid   | Description                                                                                                                                                                                                                                             | Reference or source |
|-----------|---------------------------------------------------------------------------------------------------------------------------------------------------------------------------------------------------------------------------------------------------------|---------------------|
| pLITMUS28 | Cloning vector, Ap <sup>r</sup>                                                                                                                                                                                                                         | New England BioLabs |
| pUC128    | Cloning vector, Ap <sup>r</sup>                                                                                                                                                                                                                         | 1                   |
| pTrc99A   | Expression vector, Ap <sup>r</sup>                                                                                                                                                                                                                      | 2                   |
| pBL5      | pTrc99A encoding AlgE4                                                                                                                                                                                                                                  | 3                   |
| pBL6      | pTrc99A encoding AlgE2                                                                                                                                                                                                                                  | 3                   |
| pBG29     | pTrc99A encoding AlgE6                                                                                                                                                                                                                                  | 4                   |
| pHE37     |                                                                                                                                                                                                                                                         | 5                   |
| pHE133    |                                                                                                                                                                                                                                                         |                     |
| pHH5      | pTrc99A encoding AlgE5                                                                                                                                                                                                                                  | 6                   |
| pHE88     | Expression plasmid encoding the A2-module of AlgE3                                                                                                                                                                                                      | 7                   |
| pHE58     | Expression plasmid encoding the A2-module of AlgE1                                                                                                                                                                                                      | 5                   |
| pBS5      | pLITMUS28 in which a 0.3 kb EcoRI-EcoRV fragment from pBG29 was inserted                                                                                                                                                                                | This study          |
| pBS7      | pLITMUS28 in which a 1.6 kb NcoI-KpnI fragment from pHE133 was inserted.                                                                                                                                                                                | This study          |
| pBS8      | pTrc99A encoding the A- module of AlgE5. <i>algE5A</i> was PCR-amplified as a 1.13 kb NcoI-XmaI fragment using pHH5 as template and M13/pUC rev and EU5-E5 as primers and inserted into the same sites of pTrc99A.                                      | This study          |
| pBS9      | pTrc99A encoding the A1-module of AlgE1. <i>algE1A1</i> was PCR-amplified as a 1.085 kb NcoI-XmaI fragment using pHE37 as template and M13/pUC rev and EU12-E1.1 as primers and inserted into the same sites in pTrc99A.                                | This study          |
| pBS10     | pTrc99A encoding the A-module of AlgE4. A 1.13 kb NcoI-KpnI fragment from pBL5 containing <i>algE4A</i> was inserted into the same sites in pTrc99A.                                                                                                    | This study          |
| pBS11     | pTrc99A encoding the A-module of AlgE2. A 1.13 kb NcoI-KpnI fragment from pBL6 containing <i>algE2A</i> was inserted into the same sites in pTrc99A.                                                                                                    | This study          |
| pBS12     | pTrc99A encoding the A1-module of AlgE3. <i>algE3A1</i> was PCR-amplified as a 1.085 kb NcoI-XmaI fragment using pBS7 as template and M13/pUC rev and EU6-E3.1 as primers and inserted into the same sites in pTrc99A.                                  | This study          |
| pBS13     | A 1.127 kb PCR-amplified NcoI-XmaI fragment containing <i>algE3A2</i> was cut with NcoI and EcoRV and the resulting 0.704 kb fragment was inserted into the same sites of pLITMUS28. pHE88 was used as template and EU10-E3.5 and EU11-E3.6 as primers. | This study          |
| pBS14     | A 1.127 kb PCR-amplified NcoI-XmaI fragment                                                                                                                                                                                                             | This study          |

|        |                                                                                                                                                                                                                                                             |            |
|--------|-------------------------------------------------------------------------------------------------------------------------------------------------------------------------------------------------------------------------------------------------------------|------------|
|        | containing <i>AlgE3A2</i> was cut with EcoRV-XmaI and the resulting 0.437 kb fragment was inserted into the same sites of pUC128. pHE88 was used as template and EU10-E3.5 and EU11-E3.6 as primers.                                                        |            |
| pBS15  | Derivative of pBS5 where an internal XmaI site was removed by site-directed mutagenesis. Primers used were EU2-E6.1 and EU3-E6.2.                                                                                                                           | This study |
| pBS17  | Derivative of pBS13 where an internal XmaI site was removed by site-directed mutagenesis. Primers used were EU8-E3.3 and EU9-E3.4.                                                                                                                          | This study |
| pBS18  | Derivative of pBS29 in which a 0.218 kb PshAI-EcoRI fragment from pBS15 was inserted.                                                                                                                                                                       | This study |
| pBS20  | Derivative of pBS17 in which a 0.473 kb EcoRV-EcoRI fragment from pBS14 was inserted.                                                                                                                                                                       | This study |
| pBS21  | pTrc99A in which a 1.120 kb PCR-amplified NcoI-XmaI fragment containing <i>algE6A</i> was inserted. pBS18 was used as template and M13/pUC rev and EU4-E6.3 as primers.                                                                                     | This study |
| pBS22  | pTrc99A encoding the A2-module of AlgE3. A 1.127 kb NcoI-XmaI fragment from pBS20 was inserted into the same sites of pTrc99A.                                                                                                                              | This study |
| pBS23  | pTrc99A in which a 1.084 kb PCR-amplified NcoI-XmaI fragment containing <i>algE1A2</i> was inserted. pHE58 was used as template and EU14 and EU13 as primers.                                                                                               | This study |
| pBS29  | pTrc99A encoding the A2-module of AlgE1. A nucleotide was inserted into pBS23 by site-directed mutagenesis. Primers used were EU23 and EU24.                                                                                                                | This study |
| pBS30  | pTrc99A encoding the A-module from AlgE6. A nucleotide was inserted into pBS21 by site-directed mutagenesis. Primers used were EU25 and EU26.                                                                                                               | This study |
| pAT111 | pTrc99A encoding AlgE4 with D119Y substitution. A synthetic <sup>1</sup> <i>algE4</i> A-module with mutations leading to D119Y was inserted into pBL5 as a NcoI-SexAI fragment.                                                                             | This study |
| pTB68  | pTrc99A encoding AlgE4 with D119F substitution                                                                                                                                                                                                              | This study |
| pTB77  | pTrc99A encoding AlgE4 with D119A substitution                                                                                                                                                                                                              | This study |
| pAT112 | pTrc99A encoding AlgEM3 with Y119D substitution. A synthetic <sup>1</sup> <i>algEM3</i> A-module with mutations leading to D119Y was inserted into pBL5 as a NcoI-SexAI fragment.                                                                           | This study |
| pAT113 | pTrc99A encoding AlgEM3 with Y119R substitution. A synthetic <sup>1</sup> gene fragment encoding the <i>algEM3</i> A-module with mutations leading to Y119R was inserted into pBL5 as a NcoI-SexAI fragment.                                                | This study |
| pAT114 | pTrc99A encoding the A-module of AlgEM1 combined with the R-modules of AlgE6. A synthetic <sup>1</sup> gene fragment encoding the R-modules of AlgE6 was inserted as a XmaI-EcoRI fragment into the vector encoding AlgEM1 isolated from the mutant library | This study |

|        |                                                                                                                                                                                                                                                              |            |
|--------|--------------------------------------------------------------------------------------------------------------------------------------------------------------------------------------------------------------------------------------------------------------|------------|
| pAT115 | pTrc99A encoding the A-module of AlgEM2 combined with the R-modules of AlgE6. A synthetic <sup>1</sup> gene fragment encoding the R-modules of AlgE6 was inserted as a BglII-EcoRI fragment into the vector encoding AlgEM2 isolated from the mutant library | This study |
|--------|--------------------------------------------------------------------------------------------------------------------------------------------------------------------------------------------------------------------------------------------------------------|------------|

1. Synthetic gene fragments were obtained from Genescript.

1. Keen, N. T., Tamaki, S., Kobayashi, D., and Trollinger, D. (1988) *Gene* **70**, 191-197
2. Amann, E., Ochs, B., and Abel, K. J. (1988) *Gene* **69**, 301-315
3. Bjerkan, T. M., Lillehov, B. E., Strand, W. I., Skjåk-Bræk, G., Valla, S., and Ertesvåg, H. (2004) *Biochem J* **381**, 813-821
4. Svanem, B. I. G., Skjåk-Bræk, G., Ertesvåg, H., and Valla, S. (1999) *J. Bacteriol.* **181**, 68-77
5. Ertesvåg, H., and Valla, S. (1999) *J. Bacteriol.* **181**, 3033-3038
6. Ramstad, M. V., Ellingsen, T. E., Josefsen, K. D., Høidal, H. K., Valla, S., Skjåk-Bræk, G., and Levine, D. W. (1999) *Enzyme Microb. Technol.* **24**, 636-646
7. Ertesvåg, H., Høidal, H. K., Schjerven, H., Svanem, B. I., and Valla, S. (1999) *Metab Eng* **1**, 262-269

Table S2. Primers used for the staggered extension process, error prone PCR and for construction of StEP templates

| Primer name | Restriction site in primer sequence | Sequence (5'-3') <sup>a, b</sup> |
|-------------|-------------------------------------|----------------------------------|
| M13/pUC rev |                                     | <b>AGCGGATAACAATTTACACAGGA</b>   |
| EU12-E1.1   | XmaI                                | CGCCCCGGGCTGCACACC               |
| EU14-E1.3   | NcoI                                | CGCAAGACCATGGTCAATGCC            |
| EU13-E1.2   | XmaI                                | AGCTGCCCCGGGGCGACC               |
| EU23        |                                     | CCAGGTCTGGCCCCGGGGATCC           |
| EU24        |                                     | GGATCCCCGGGGCCGACCTGG            |
| EU6-E3.1    | XmaI                                | GTACCGTCCCGGGCTGCAC              |
| EU10-E3.5   | NcoI                                | CAGACCATGGTCAATGCCAAGG           |
| EU11-E3.6   | XmaI                                | CTGGCCGGTCCCGGGCTG               |
| EU8-E3.3    |                                     | CACCGGGGATCCTGGCGACGGCT          |
| EU9-E3.4    |                                     | AGCCGTCGCCAGGATCCCCGGTG          |
| EU5-E5      | XmaI                                | TGGCCGGTCCCGGGCAGGTC             |
| EU2-E6.1    |                                     | CTGAACACACGGGTCGAGGGCAAC         |
| EU3-E6.2    |                                     | GTTGCCCTCGACCCGTGTGTTTACG        |
| EU4-E6.3    | XmaI                                | ACAGTGCCCGGGACCGTCG              |
| EU25        |                                     | CGAATTCGACGGTACCCGGGGATC         |
| EU26        |                                     | GATCCCCGGGTACCGTCGAATTCG         |
| EU20        |                                     | GAGCTGGTCGTCCGTGTTCGC            |
| Britt 35    |                                     | AGCTTATCATCGACTGCACGGTG          |
| Britt 28    |                                     | CACACTACCATCGGCGCTACG            |

<sup>a</sup> Restriction sites are underlined

<sup>b</sup> Nucleotides shown in bold are not part of *A. vinelandii* wild type sequence

*Table S3. NMR analysis of polyM epimerised with AlgE6 and mutant epimerases AlgEM1-6. Epimerisation was performed with polyM (10 mg) and enzyme (0.2 mg) in MOPS, pH 6.9 with 100 mM NaCl and 1.5 mM CaCl<sub>2</sub>*

| Enzyme | F <sub>G</sub> | F <sub>M</sub> | F <sub>GG</sub> | F <sub>MG</sub> /F <sub>GM</sub> | F <sub>MM</sub> | F <sub>MGM</sub> |
|--------|----------------|----------------|-----------------|----------------------------------|-----------------|------------------|
| AlgE6  | 0.77           | 0.23           | 0.69            | 0.074                            | 0.16            | 0.048            |
| AlgEM1 | 0.85           | 0.15           | 0.78            | 0.061                            | 0.094           | 0.030            |
| AlgEM2 | 0.83           | 0.17           | 0.74            | 0.088                            | 0.085           | 0.027            |
| AlgEM3 | 0.54           | 0.46           | 0.22            | 0.33                             | 0.13            | 0.25             |
| AlgEM4 | 0.67           | 0.33           | 0.44            | 0.23                             | 0.10            | 0.15             |
| AlgEM5 | 0.59           | 0.41           | 0.31            | 0.28                             | 0.13            | 0.21             |
| AlgEM6 | 0.40           | 0.60           | 0.039           | 0.36                             | 0.23            | 0.33             |



*Table S4. Sequence properties of the A-modules from epimerase mutants AlgEM1-6*

| Enzyme | % identity to wild type A-modules <sup>1)</sup> |      |    |      |      |    |    |    | New amino acid residues introduced by mutagenesis <sup>2)</sup> |
|--------|-------------------------------------------------|------|----|------|------|----|----|----|-----------------------------------------------------------------|
|        | E1A1                                            | E1A2 | E2 | E3A1 | E3A2 | E4 | E5 | E6 |                                                                 |
| AlgEM1 | 93                                              | 74   | 87 | 92   | 80   | 84 | 86 | 76 | D/A/G354Y                                                       |
| AlgEM2 | 89                                              | 73   | 92 | 88   | 78   | 76 | 93 | 77 | D/S61I, V136A, G/A332S                                          |
| AlgEM3 | 81                                              | 75   | 81 | 82   | 78   | 92 | 80 | 77 | V63A, D119Y                                                     |
| AlgEM4 | 85                                              | 74   | 82 | 86   | 78   | 88 | 82 | 77 | D17V, A265T, G327S                                              |
| AlgEM5 | 83                                              | 74   | 79 | 82   | 76   | 92 | 79 | 77 | N4K, A32S, D54A, S/A190T                                        |
| AlgEM6 | 81                                              | 76   | 81 | 80   | 78   | 95 | 81 | 79 | V/I78D, P/D130V                                                 |

1) Given as % amino acid identity over 376 N-terminal residues constituting the A-module.

2) Residues before the position number indicates amino acids present in the wild type A-modules.

*Table S5. NMR analysis of polyM epimerised with AlgE4 and AlgEM3 and derivatives of these enzymes with substitutions in residue 119. Epimerisation was performed with polyM (10 mg) and enzyme (0.2 mg) in MOPS, pH 6.9 with 100 mM NaCl and 1.5 mM CaCl<sub>2</sub>.*

| Epimerase     | F <sub>G</sub> <sup>*</sup> | F <sub>GG</sub> <sup>*</sup> | F <sub>MGM</sub> <sup>*</sup> |
|---------------|-----------------------------|------------------------------|-------------------------------|
| AlgE4 (D119)  | 0.47                        | 0                            | 0.47                          |
| AlgE4 D119Y   | 0.50/0.50                   | 0.083/0.085                  | 0.41/0.40                     |
| AlgE4 D119F   | 0.50                        | 0.089                        | 0.41                          |
| AlgE4 D119A   | 0.48                        | 0.044                        | 0.44                          |
| AlgEM3 (Y119) | 0.64/0.64                   | 0.39/0.38                    | 0.17/0.18                     |
| AlgEM3 Y119D  | 0.57/0.58                   | 0.27/0.27                    | 0.23/0.23                     |
| AlgEM3 Y119R  | 0.36/0.37                   | 0.024/0.032                  | 0.35/0.33                     |

\*Were two values are shown, the results are obtained from two independent epimerization experiments.
